# Supplementary material
Source: PubMed Central journal article supplement (PMC2965028)
Supplement: NIHMS233600-supplement-1_si_001.pdf [file NIHMS233600-supplement-1_si_001.pdf]

## Supporting Information Figure S1

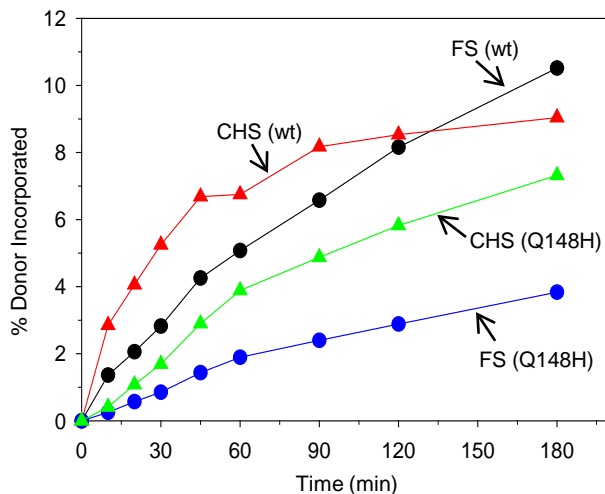

Supporting Information Figure S1. *Concerted Integration Activity is Reduced in Q148H*. IN-DNA complexes were pre-assembled with wt IN or Q148H IN (both at 30 nM) with 5'-<sup>32</sup>P end-labeled 1.6 kb U5 blunt-ended donor at 14°C for 15 min. After the addition of supercoiled target DNA (1.5 nM), strand transfer was allowed up to 180 min. Samples taken at various times were deproteinized and the quantities of strand transfer products were determined. FS and CHS products obtained with wt and mutant IN were plotted. The percentage of donor DNA incorporated in concerted FS product after 180 min was 10.5% and 3.5% with wt IN and Q148H IN, respectively. CHS products were 9.0 and 7.3% respectively.
